# Supplementary material for: Ultra-stretchable and healable hydrogel-based triboelectric nanogenerators for energy harvesting and self-powered sensing
Source: Royal Society of Chemistry journal article supplement (doi:10.1039/d1ra02010b), 2021-01-01
Supplement: d1ra02010b1.pdf [file d1ra02010b1.pdf]

## Supplementary Information

### **Ultra-stretchable and healable hydrogel-based triboelectric nanogenerators for energy harvesting and self-powered sensing**

Guoxia Li<sup>a,b</sup>, Longwei Li<sup>b,c</sup>, Panpan Zhang<sup>b\*</sup>, Caiyun Chang<sup>a,b</sup>, Fan Xu<sup>b,c</sup>,

Xiong Pu<sup>a,b,c\*</sup>

<sup>a</sup> School of Chemistry and Chemical Engineering, Center on Nanoenergy Research, School of Physical Science and Technology, Guangxi University, Nanning 530004, China.

<sup>b</sup> CAS Center for Excellence in Nanoscience, Beijing Key Laboratory of Micro-Nano Energy and Sensor, Beijing Institute of Nanoenergy and Nanosystems, Chinese Academy of Sciences, Beijing 101400, China.

<sup>c</sup> School of Nanoscience and Technology, University of Chinese Academy of Sciences, Beijing 100049, China.

Email: [puxiong@binn.cas.cn](mailto:puxiong@binn.cas.cn); [zhangpanpan@binn.cas.cn](mailto:zhangpanpan@binn.cas.cn)

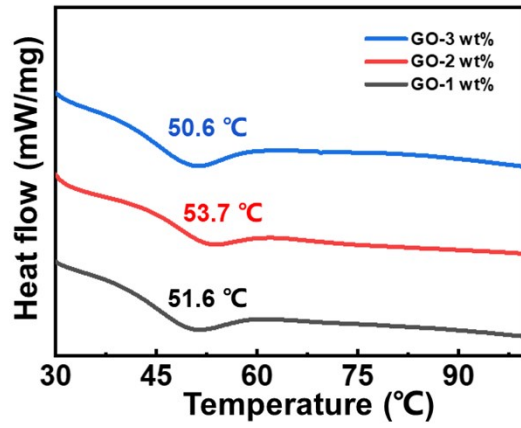

**Fig. S1.** DSC curves of the of hydrogels with different contents of GO.

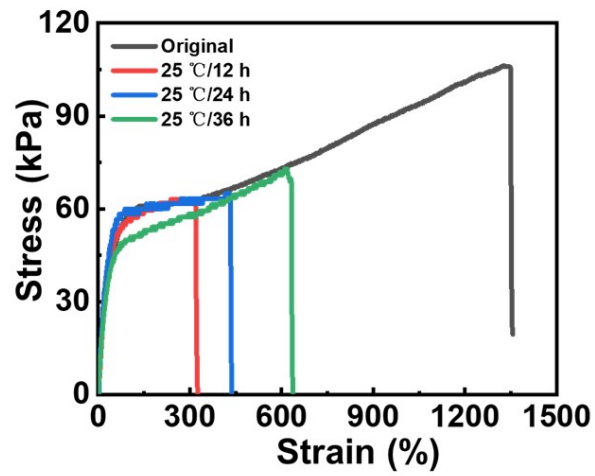

**Fig. S2.** Stress–strain curves of original and healed hydrogels under different healing times at 25 °C.

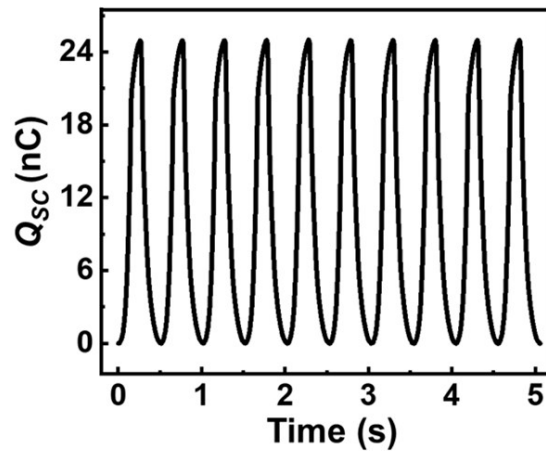

**Fig. S3.** Short-circuit charge quantity  $Q_{sc}$  of the TENG.

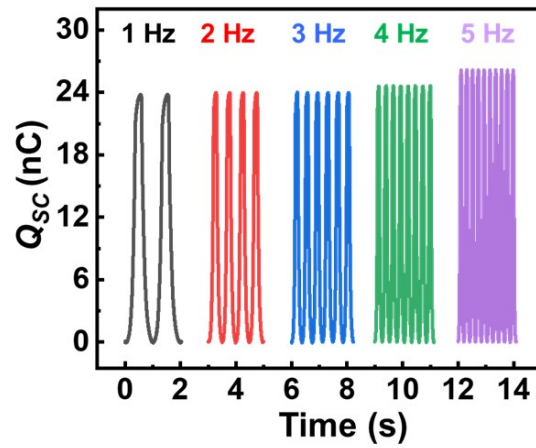

**Fig. S4.**  $I_{SC}$  of the TENG under different driven frequency from 1 to 5 Hz.

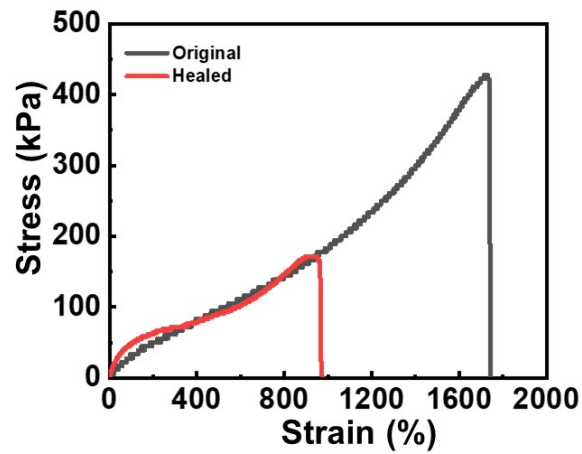

**Fig. S5.** Stress-strain curves of the pristine VHB film and after attaching two cut pieces together in 1 min.

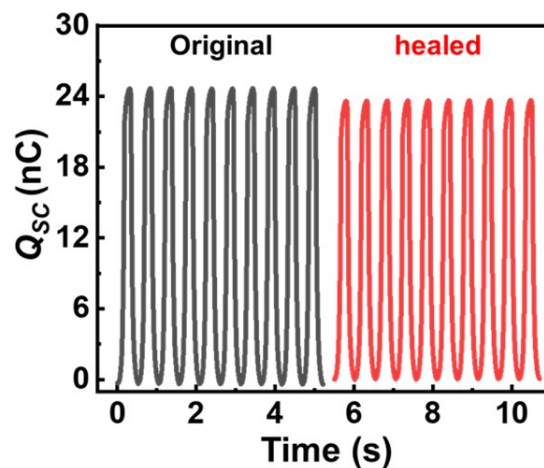

**Fig. S6.** Comparison of the  $Q_{SC}$  of the TENG before and after self-healing.

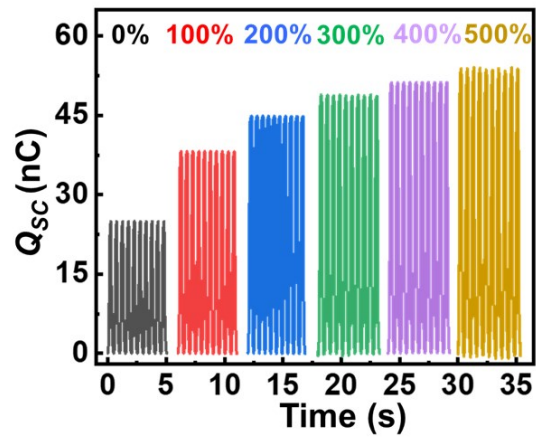

**Fig. S7.**  $Q_{sc}$  of the TENG stretched to different strains.
